# Supplementary material for: Immune activation and inflammatory biomarkers as predictors of venous thromboembolism in lymphoma patients
Source: Springer Nature journal article supplement (doi:10.1186/s12959-022-00381-3), 2022-04-19
Supplement: MOESM1 [file 20324358]

# TUMOR MICROENVIRONMENT

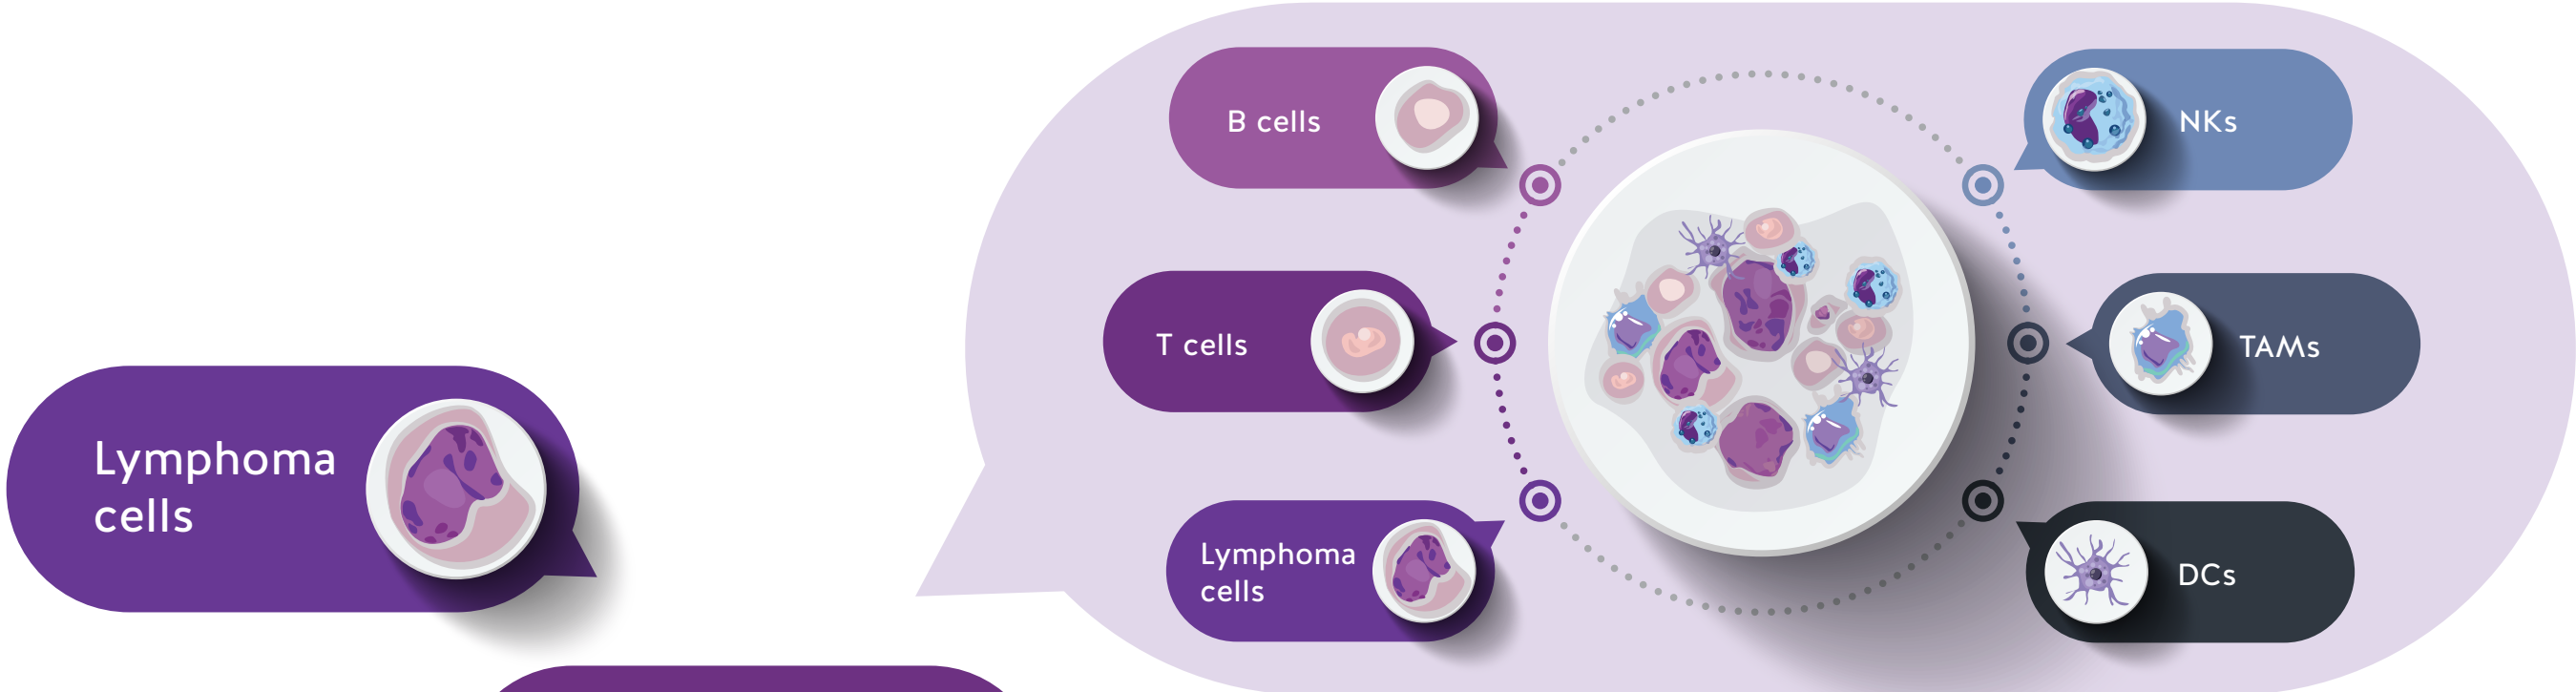

Immune dysregulation

Increased risk of VTE development

Increased inflammatory biomarkers (NLR, PLR, CRP)

Identify patients at risk of VTE

- NKs - NK cells
- TAMs - tumor-associated macrophages
- DCs - dendritic cells
- NLR - neutrophil to lymphocyte ratio
- PLR - platelet to lymphocyte ratio
- CRP - C-reactive protein
- VTE - venous thromboembolism
